# Supplementary material
Source: publisher site journal article supplement (https://fr.pensoft.net/article/84604/download/suppl/31/)
Supplement: Supplementary file 1

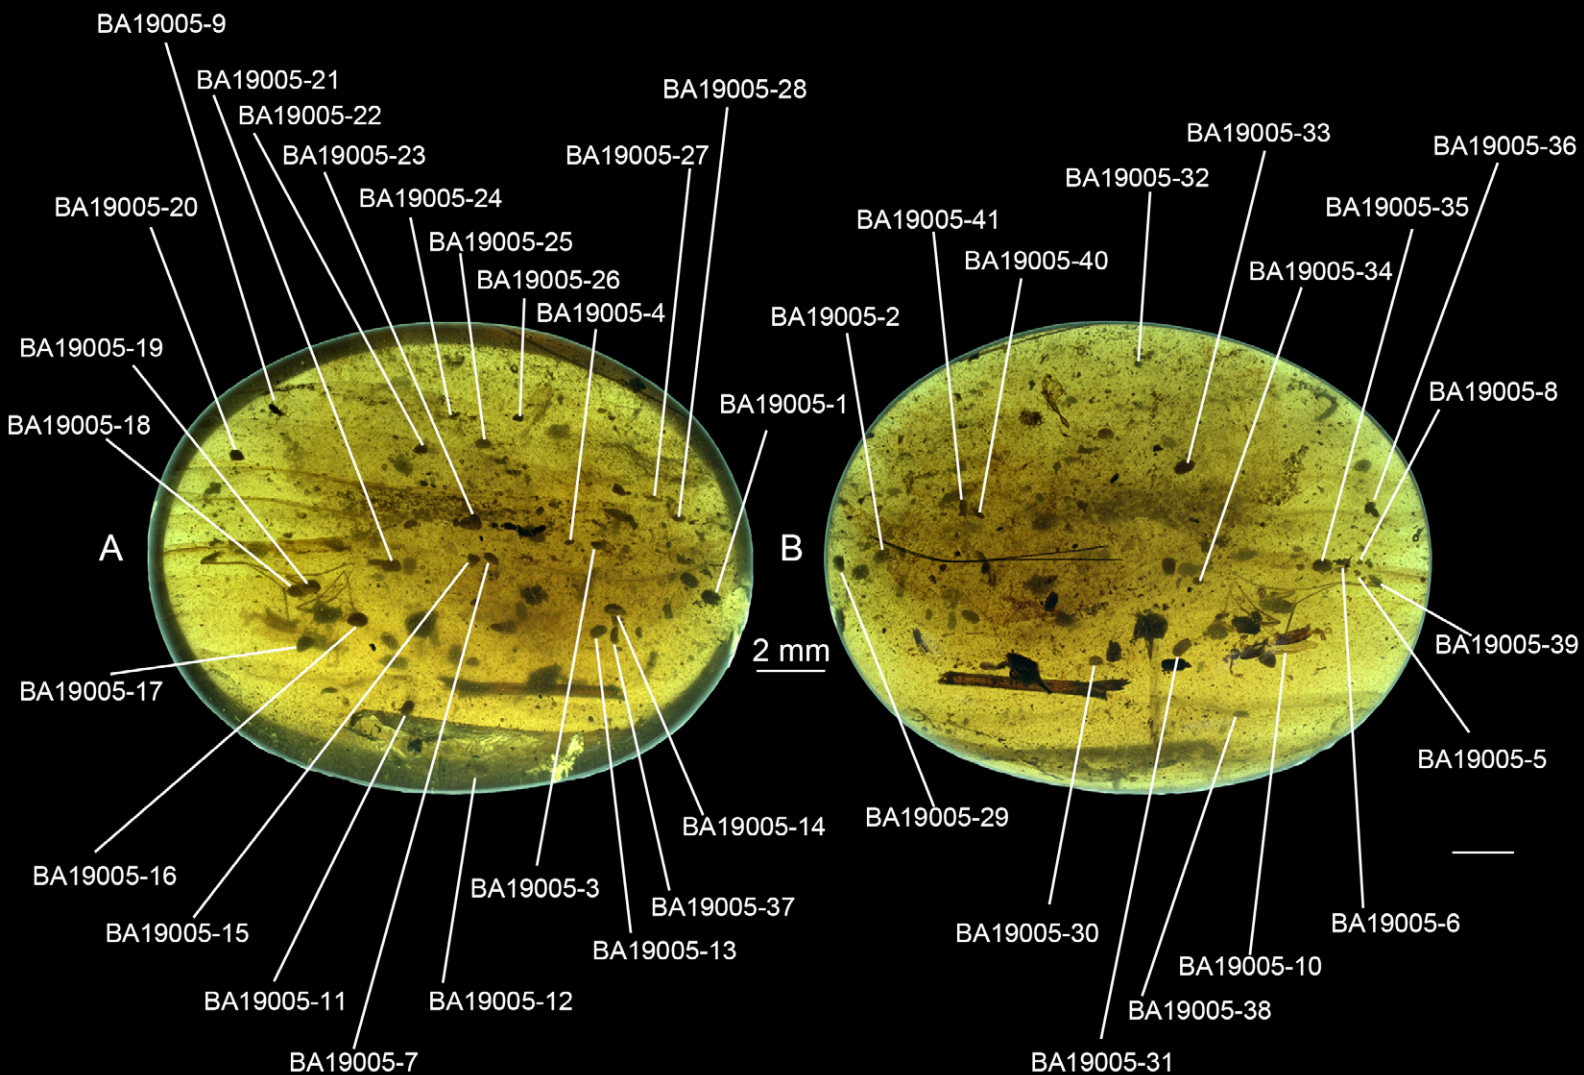

**Figure S1.** Light-microscopical images of the Kachin amber piece with 39 embedded ostracods mapped with their collection numbers. Revised from Wang et al. (2020b).
